# Supplementary material
Source: PubMed Central journal article supplement (PMC4001856)

## Supplementary Figures

### Figure S1

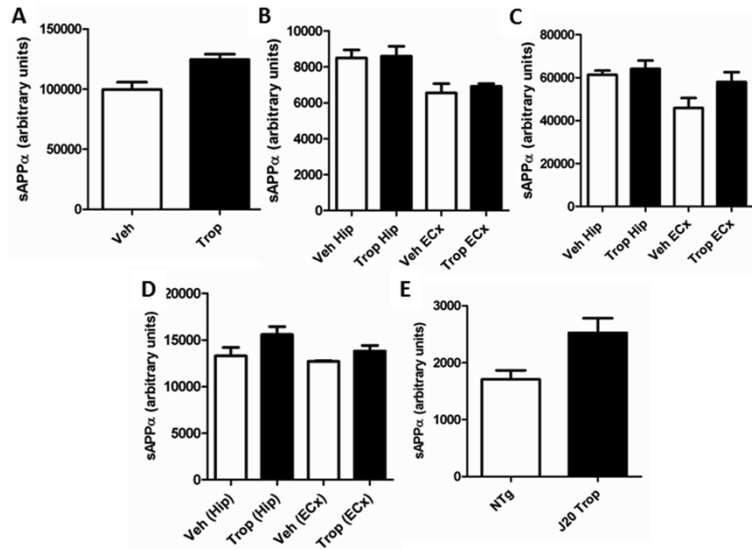

### Figure S2

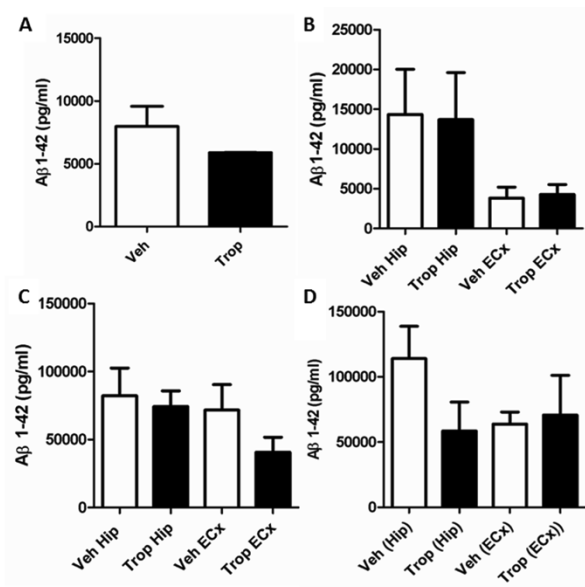

**Figure S3**

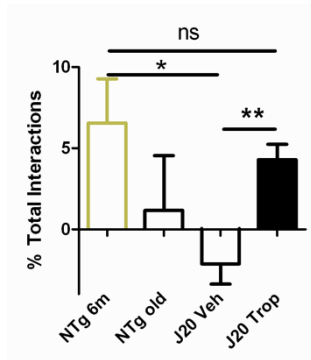

**Figure S4.**

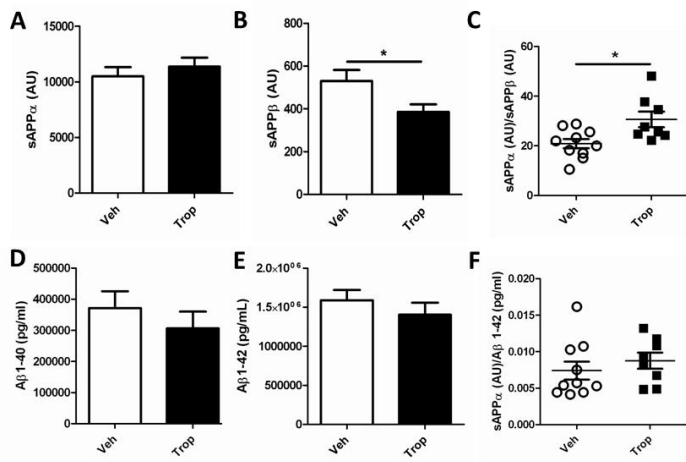

Supplement: NIHMS568541-supplement-01.pdf [file NIHMS568541-supplement-01.pdf]
